# Supplementary material for: A self-powered photodetector through facile processing using polyethyleneimine/carbon quantum dots for highly sensitive UVC detection
Source: Royal Society of Chemistry journal article supplement (doi:10.1039/d3ra08538d), 2024-01-01
Supplement: d3ra08538d1.pdf [file d3ra08538d1.pdf]

## SUPPORTING INFORMATION

### **Self-powered photodetector through facile processing using polyethyleneimine/carbon quantum dots for highly sensitive UVC detection**

Vo Pham Hoang Huy, Chung Wung Bark\*

*Department of Electrical Engineering, Gachon University, Seongnam, Gyeonggi 13120,  
Republic of Korea*

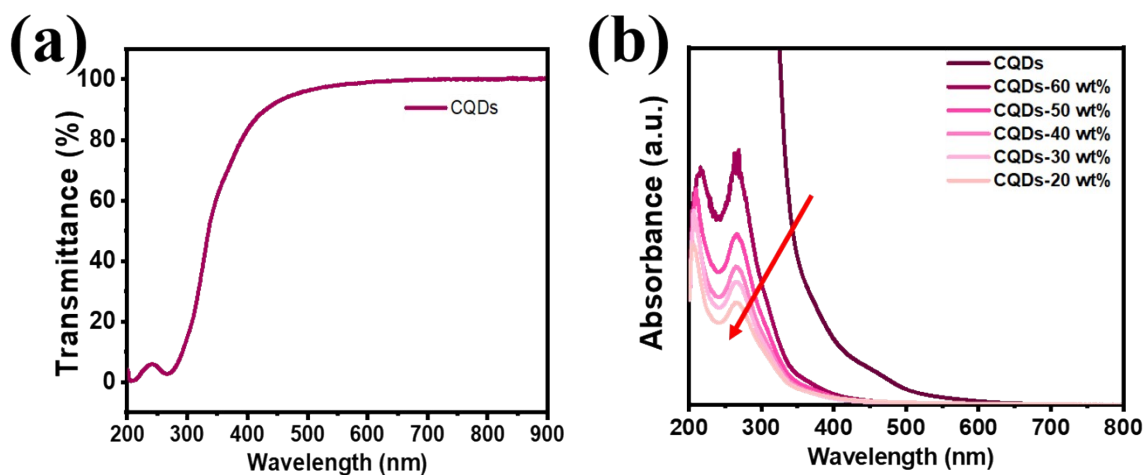

**Fig. S1.** (a) Transmittance of CQDs, (b) UV-Vis of CQDs at different dilute concentration.

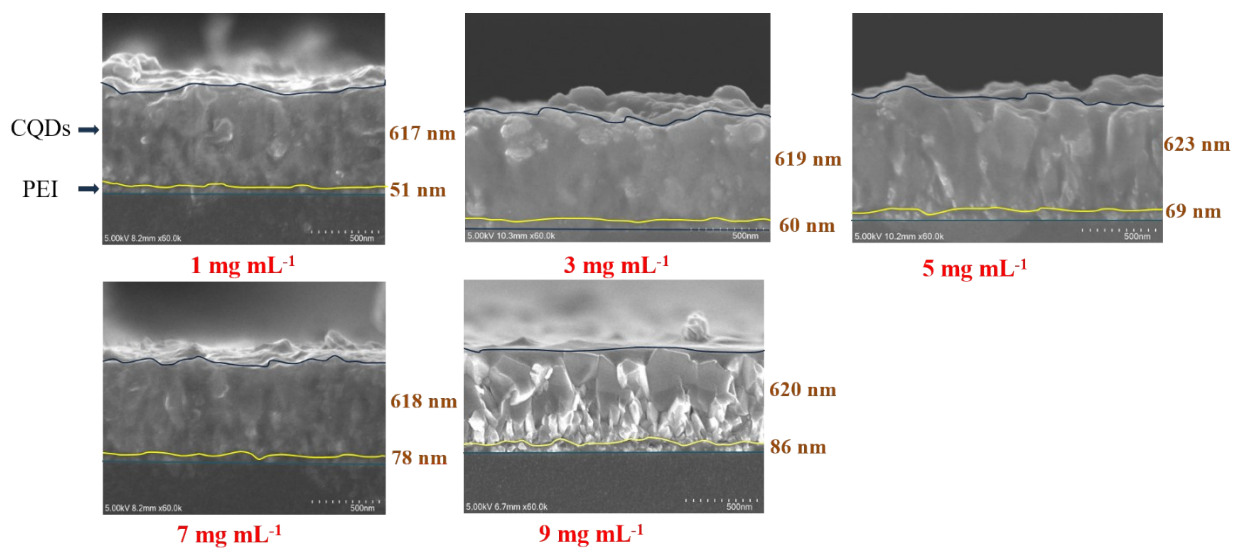

**Fig. S2.** Cross-sectional SEM image of different solution concentration of PEI at fixed dilute concentration of CQDs-50

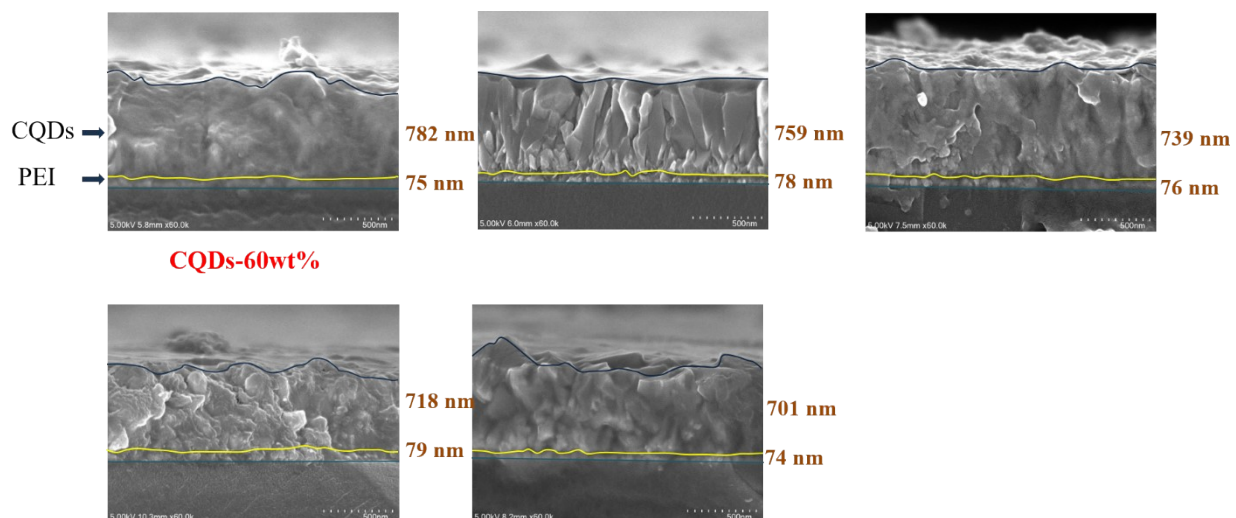

**Fig. S3.** Cross-sectional SEM image of different dilute concentration of CQDs at fixed solution concentration of PEI-5.

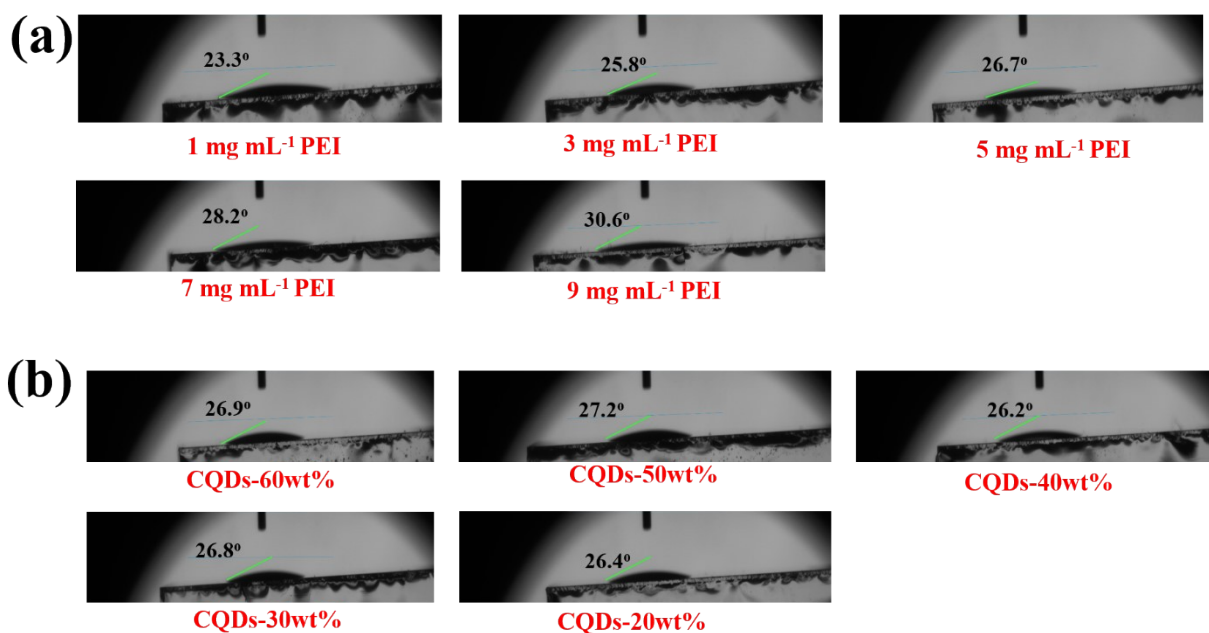

**Fig. S4.** Contact angel measurement of (a) PEI at different concentration, and (b) CQDs at different dilute concentration.

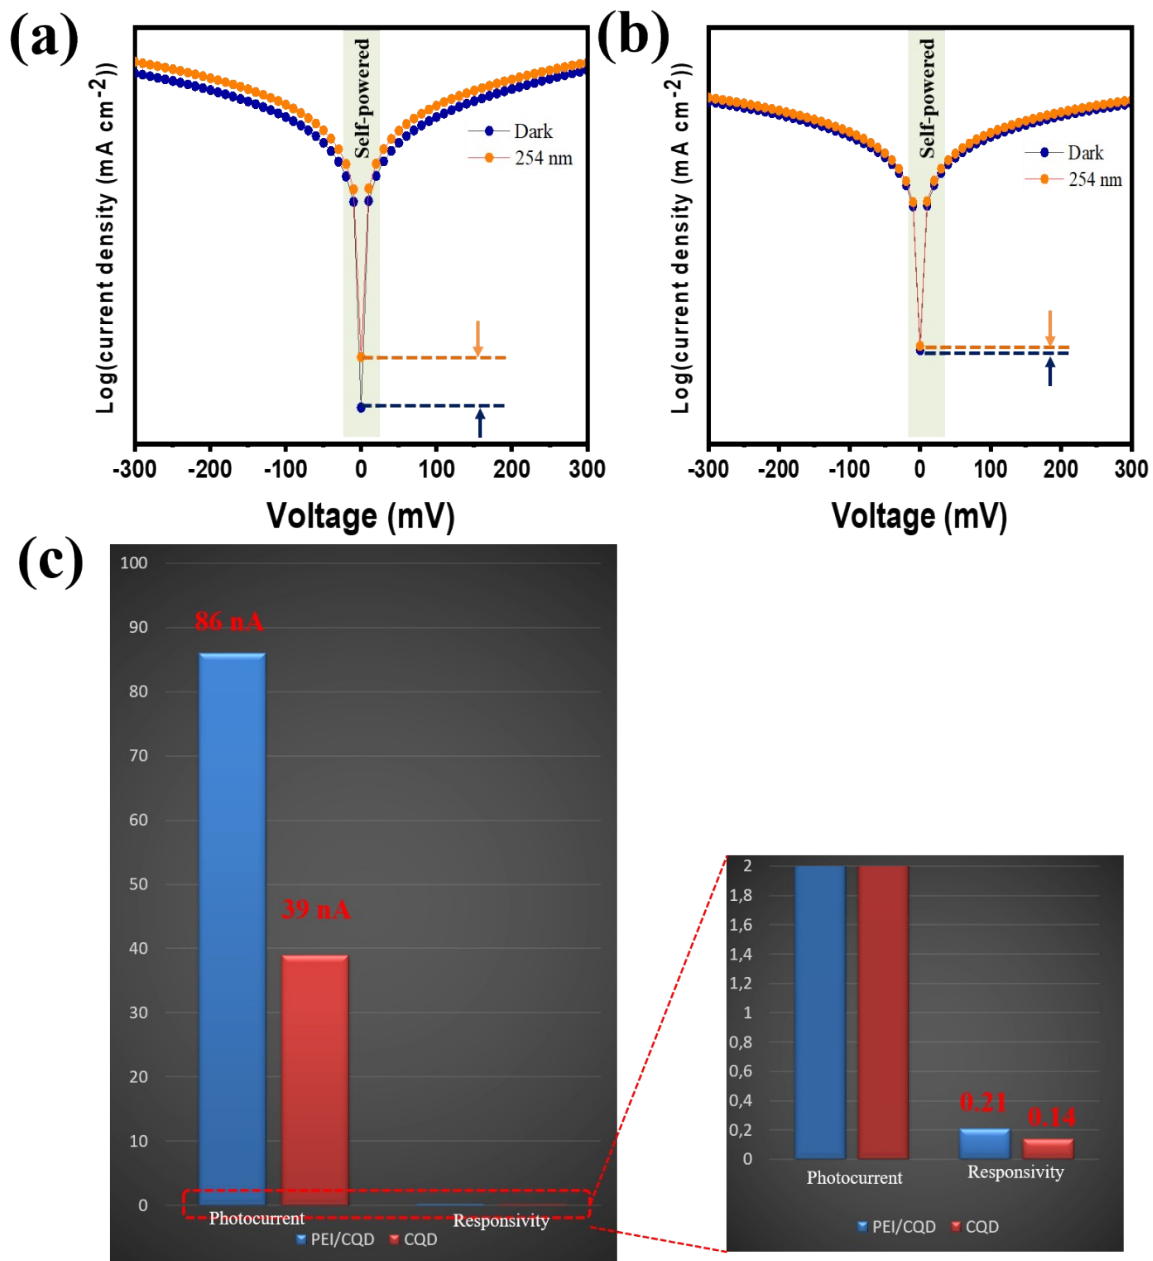

**Fig. S5.** I-V profile of (a) FTO/glass/PEI/CQDs/PEDO:TPSS/Au, (b) FTO/glass/CQDs/PEDO:TPSS/Au, (c) photocurrent and responsivity of these structure

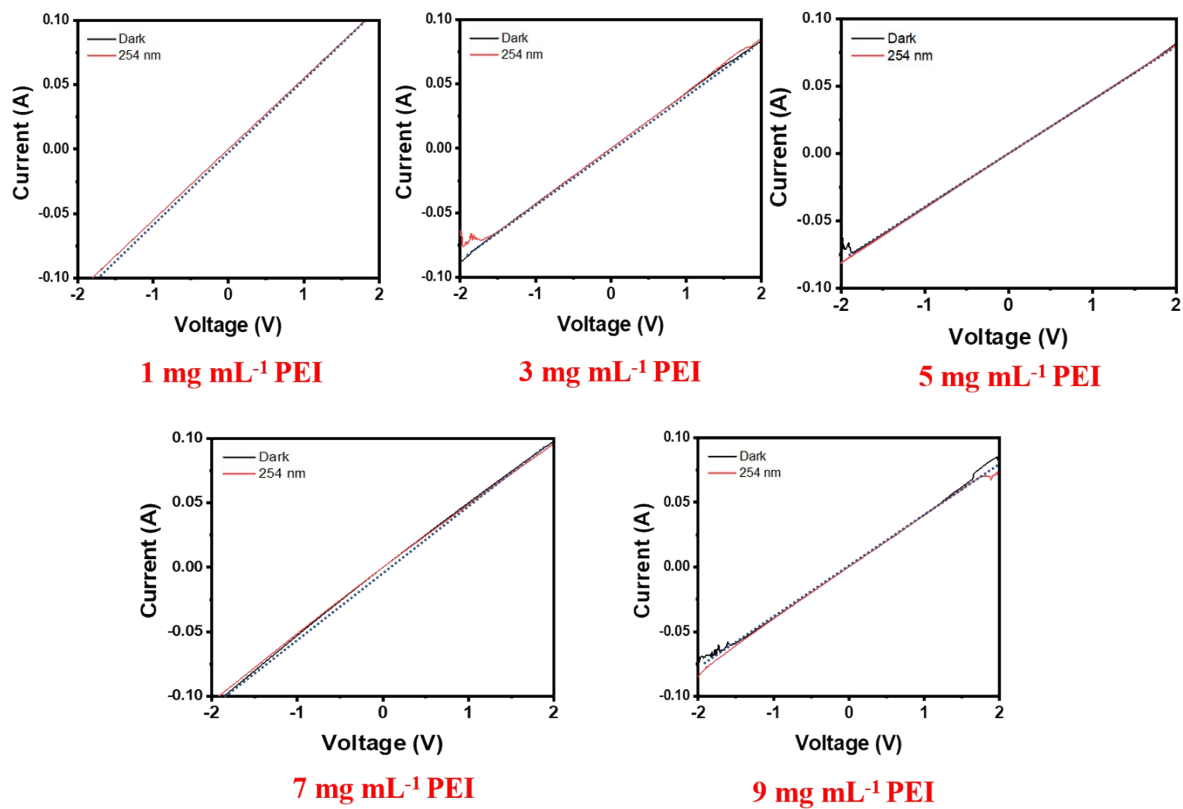

**Fig. S6.** I-V profile of PEI at different solution concentration

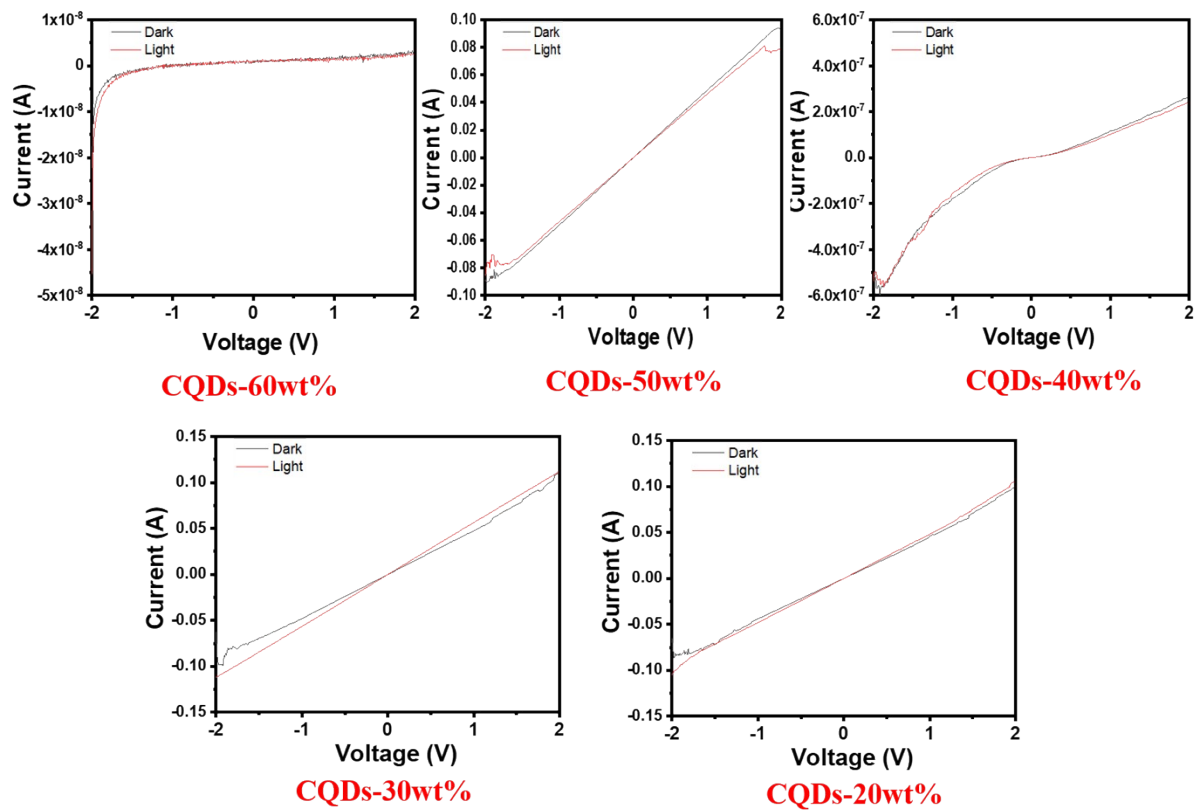

**Fig. S7.** I-V profile of CQDs at different dilute concentration

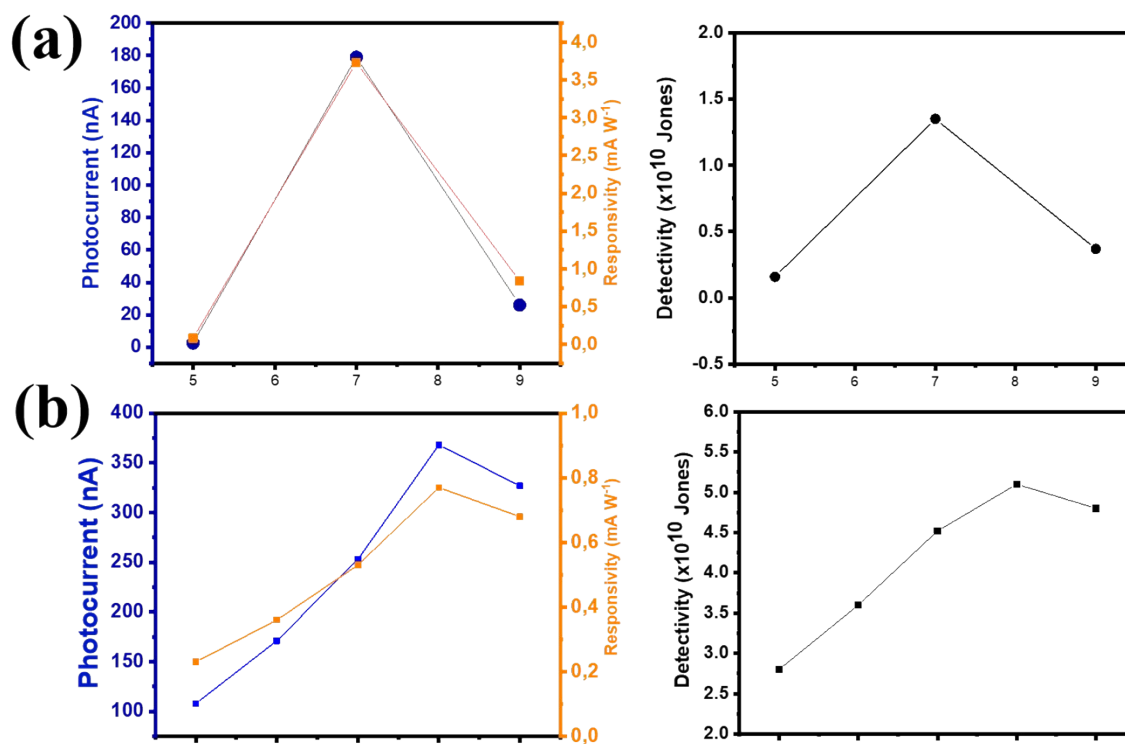

**Fig. S8.** Photocurrent, responsivity and detectivity of (a) PEI at different solution concentration, and (b) CQDs at different dilute concentration.

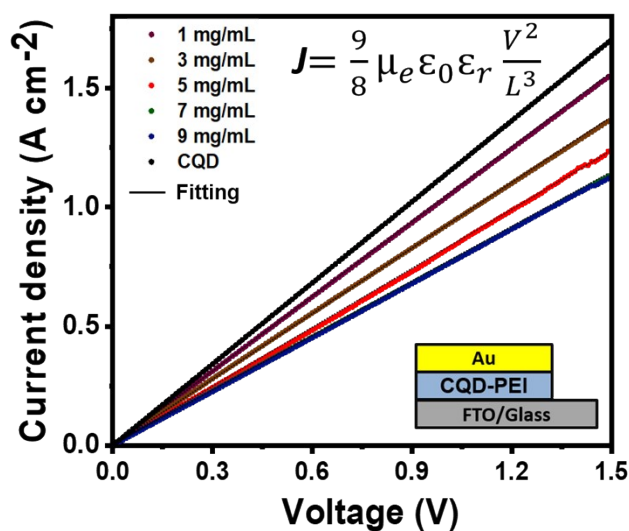

❖ The electron mobility:

- **CQD**:  $2.3 \times 10^{-4} \text{ cm}^2 \text{ V}^{-1} \text{ s}^{-1}$
- **1 mg mL<sup>-1</sup> PEI**:  $4.53 \times 10^{-6} \text{ cm}^2 \text{ V}^{-1} \text{ s}^{-1}$
- **3 mg mL<sup>-1</sup> PEI**:  $4.1 \times 10^{-6} \text{ cm}^2 \text{ V}^{-1} \text{ s}^{-1}$
- **5 mg mL<sup>-1</sup> PEI**:  $3.5 \times 10^{-6} \text{ cm}^2 \text{ V}^{-1} \text{ s}^{-1}$
- **7 mg mL<sup>-1</sup> PEI**:  $3.3 \times 10^{-6} \text{ cm}^2 \text{ V}^{-1} \text{ s}^{-1}$
- **9 mg mL<sup>-1</sup> PEI**:  $3.3 \times 10^{-6} \text{ cm}^2 \text{ V}^{-1} \text{ s}^{-1}$

**Fig. S9.** J-V profile of CQDs at different dilute concentration, where  $\mu_e$ : Apparent charge carrier mobility,  $\epsilon_0$ : vacuum permittivity ( $1.5 \times 10^{-10}$ ),  $\epsilon_r$ : the relative dielectric constant of CQD (4.5),  $V$ : applied voltage,  $L$ : the thickness of the film.



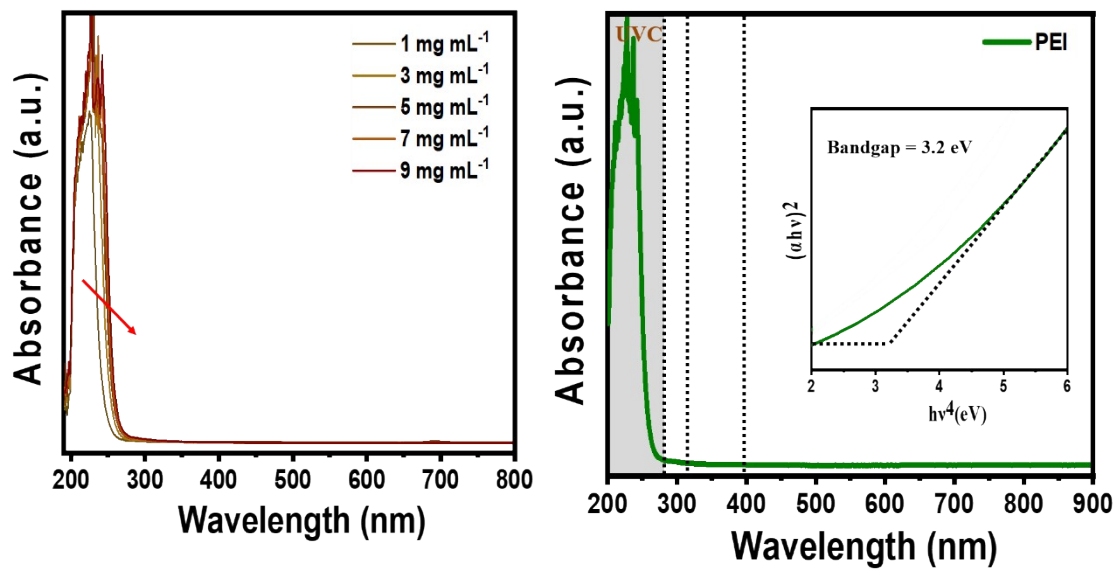

**Fig. S10.** UV-Vis of (a) PEI at different solution concentration, (b) PEI-7 ((inset: Tauc plot)

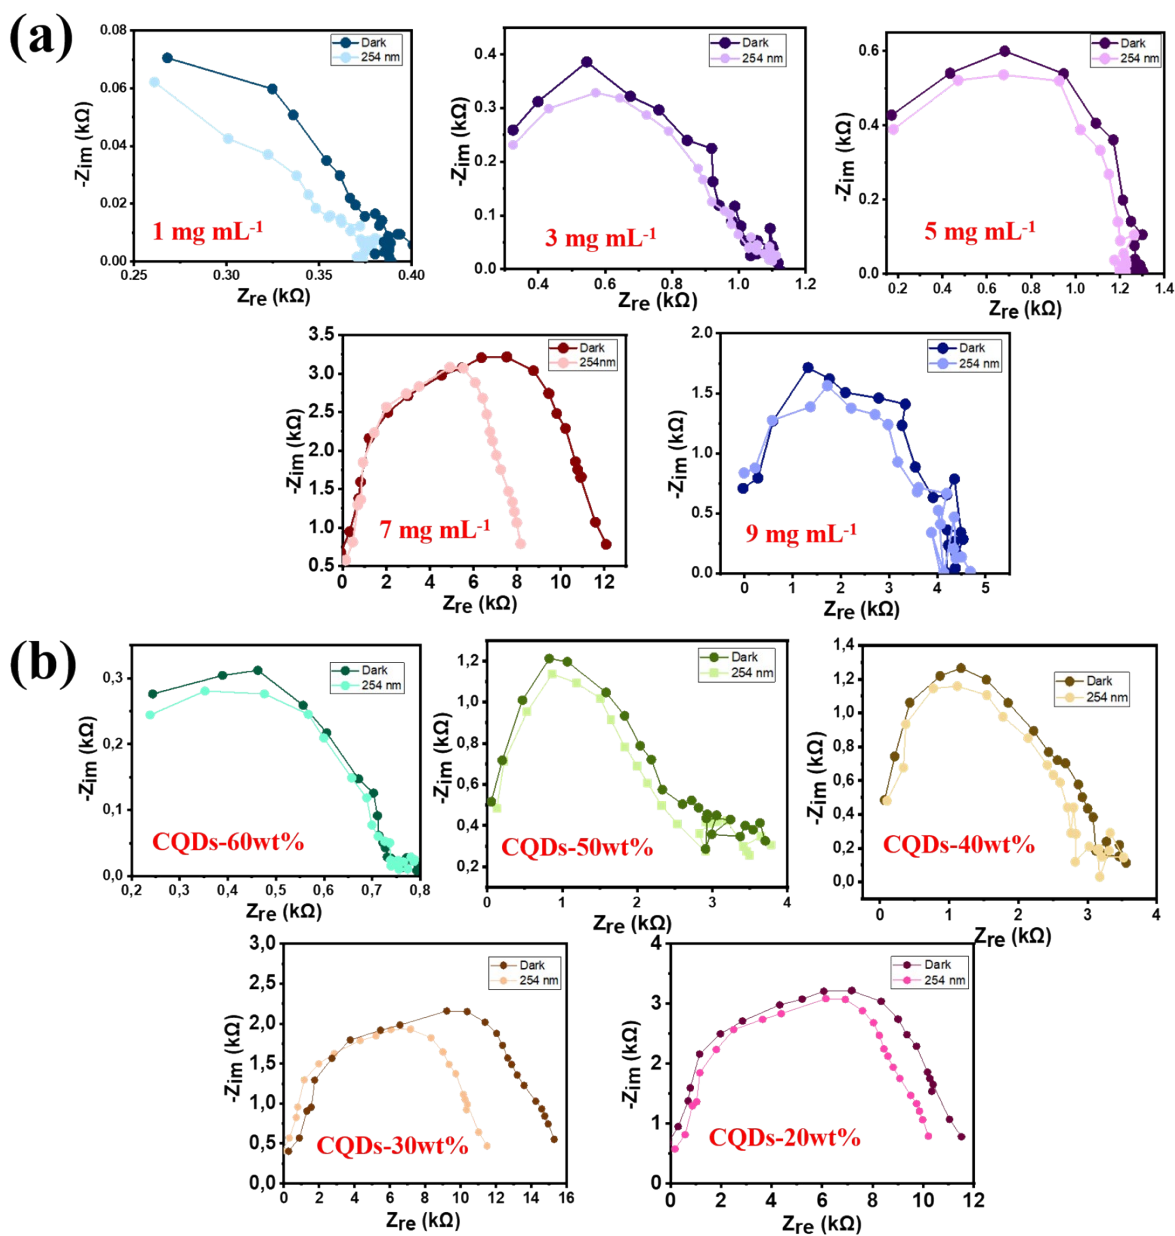

**Fig. S11.** Nyquist plots of (a) PEI and (b) CQDs at various solution concentrations before and after exposure to light of 254 nm wavelength.

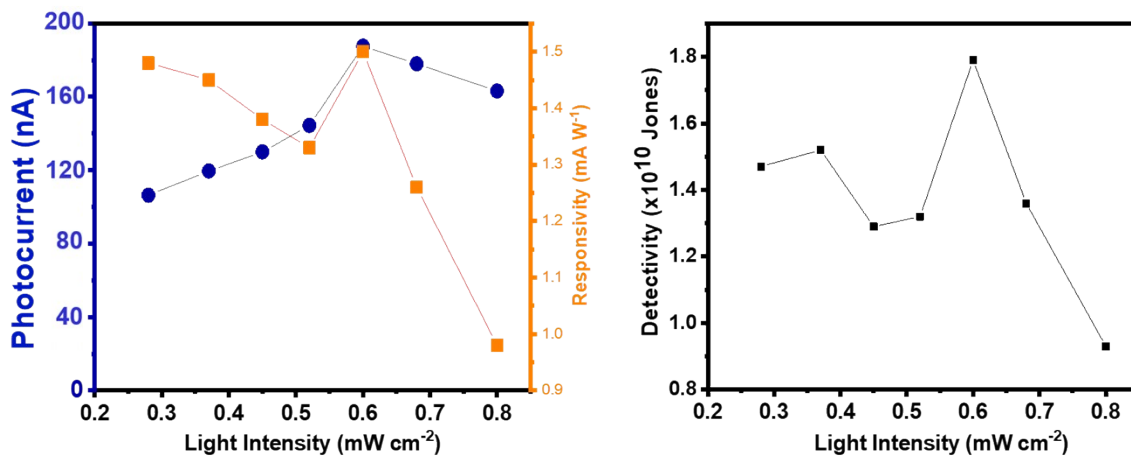

Fig. S12. Photocurrent, responsivity and detectivity of at various light intensity

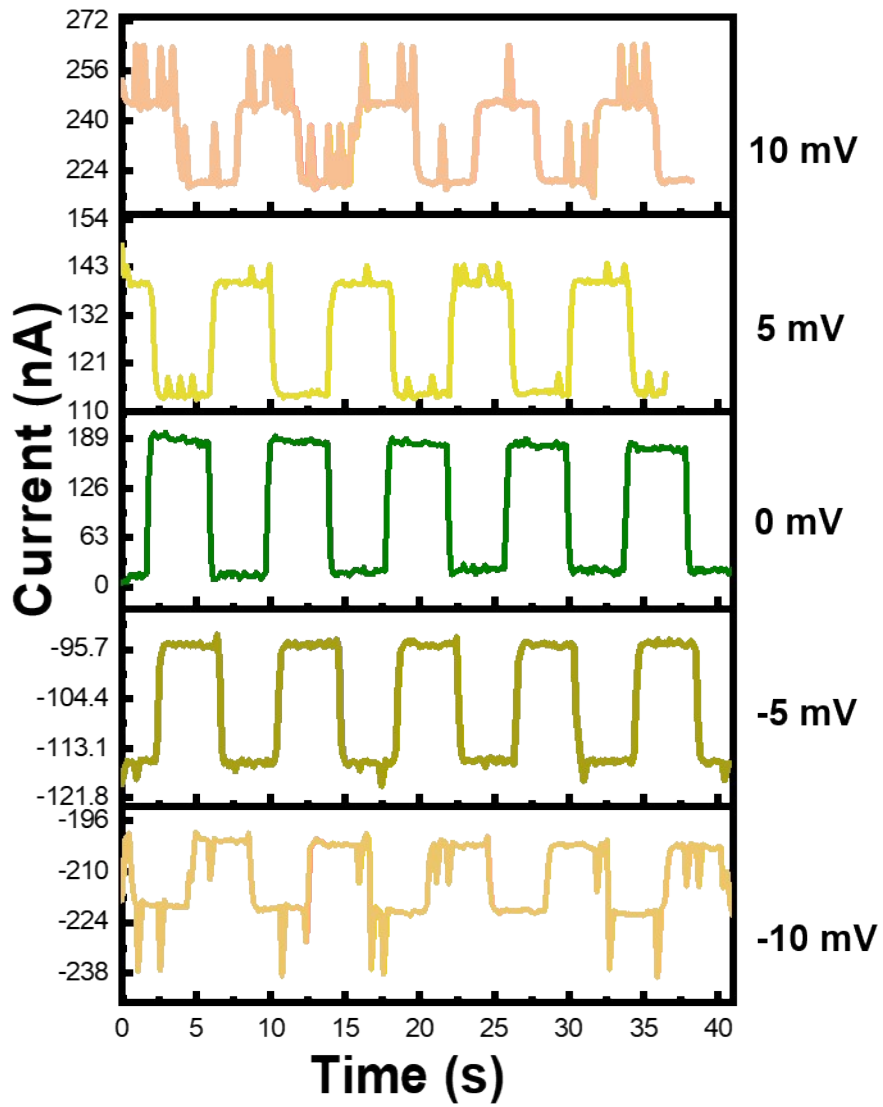

**Fig. S13.** I-t graph at the bias of -10, -5, 0, 5, and 10 mV under 254 nm light

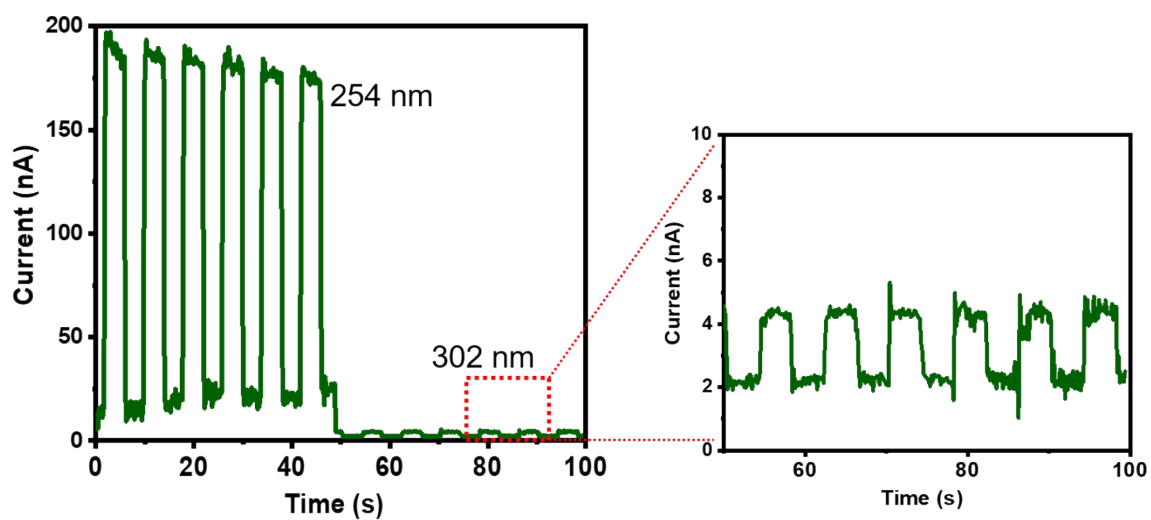

**Fig. S14.** Photocurrent versus time for photodetector under UVC and UVB

illumination with an intensity of  $0.6 \text{ mW cm}^{-2}$
